# Supplementary material
Source: Springer Nature journal article supplement (https://www.springermedizin.de/resource/supplementary/13229_2013_114_MOESM4_ESM.pdf/9676192)
Supplement: MOESM4 [file 9676192]

## 1a) Stage 1 discovery study

- Genome-wide linkage analysis
- 847 multiplex families from AGRE
- SNP genotypes from Illumina 550K & Omni-1

## 1b) Linkage signals in samples including AGRE

| Source                 | Subgrp | Locus       | Peak LOD |
|------------------------|--------|-------------|----------|
| Liu et al. (2001)      | ALL    | 5p13.1      | 2.55     |
|                        | ALL    | Xq26.1      | 2.56     |
| Yonan et al. (2003)    | ALL    | 5p13.1      | 2.54     |
|                        | ALL    | 11p13-11.2  | 2.24     |
|                        | ALL    | 17q11.2     | 2.83     |
| Stone et al. (2004)    | MO     | 17q11       | 4.3*     |
|                        | FC     | 4q32.3-35.1 | 2.7      |
| Cantor et al. (2005)   | MO     | 17q21       | 3.6*     |
| McCauley et al. (2005) | ALL    | 3p25.3      | 2.22     |
| Szatmari et al. (2007) | MO     | 5q12        | 2.31     |
|                        | MO     | 9q33.3      | 2.36     |
|                        | ALL    | 11p12       | 2.77     |
|                        | FC     | 11p12       | 2.86     |
| Weiss et al. (2009)    | ALL    | 6q27        | 2.94     |
|                        | ALL    | 20p13       | 3.81*    |

\* Genome-wide significant linkage

## 2) Combined stage extension study

- Regional linkage analysis in loci with suggestive LOD scores
- 1008 multiplex families from AGRE
- SNP genotypes from Illumina Omni-1 & Omni-2.5

## 3) Replication study

- Regional linkage analysis in loci with genome-wide significant LOD scores (LOD>3.6)
- Multiplex families from AGRE not tested in the corresponding discovery sample
